# **SPIRO – the automated Petri plate imaging platform designed by biologists, for biologists**

Jonas A Ohlsson<sup>1\*</sup>, Jia Xuan Leong<sup>2,3\*</sup>, Pernilla H Elander<sup>1</sup>, Adrian N Dauphinee<sup>1</sup>, Florentine Ballhaus<sup>1</sup>, Johan Johansson<sup>4</sup>, Mark Lommel<sup>2</sup>, Gero Hofmann<sup>2</sup>, Staffan Betnér<sup>5,6,7</sup>, Mats Sandgren<sup>1</sup>, Karin Schumacher<sup>2</sup>, Peter V Bozhkov<sup>1</sup> and Elena A Minina<sup>1,2\*</sup>

<sup>1</sup>Department of Molecular Sciences, Uppsala BioCenter, Swedish University of Agricultural Sciences and Linnean Center for Plant Biology, P.O. Box 7015, Uppsala, SE-750 07, Sweden

<sup>2</sup> Centre for Organismal Studies (COS), Heidelberg University. Im Neuenheimer Feld 230. 69120 Heidelberg, Germany

<sup>3</sup>Center for Plant Molecular Biology (ZMBP), University of Tübingen, Auf der Morgenstelle 32. D-72076 Tübingen, Germany

<sup>4</sup>Johan's 3D printing service, Uppsala, Sweden

<sup>5</sup>Centre for Occupational and Environmental Medicine, Stockholm County Council, Stockholm, Sweden.

<sup>6</sup>Department of Energy and Technology, Division of Applied Statistics and Mathematics, PO Box 7032, Swedish University of Agricultural Sciences, SE-750 07 Uppsala, Sweden.

<sup>7</sup>Institute of Environmental Medicine, Karolinska Institutet, SE-171 77, Stockholm, Sweden.

\*For correspondence:

EAM: [alena.minina@slu.se](mailto:alena.minina@slu.se)

JAO: [jonas.ohlsson@slu.se](mailto:jonas.ohlsson@slu.se)

JXL: [jia-xuan.leong@zmbp.uni-tuebingen.de](mailto:jia-xuan.leong@zmbp.uni-tuebingen.de)

## Abstract

The imaging of plant seedlings, fungal mycelia and bacterial colonies grown on Petri plates is common in phenotyping assays, and is typically done manually despite the procedures being time-consuming and laborious. The main reason for this is the still limited availability of existing automated phenotyping tools and facilities. Additionally, constructing a custom-made automated solution is a daunting task for most research groups specializing in biology.

Here, we describe SPIRO, the Smart Plate Imaging Robot, an automated platform that acquires time-lapse photos of up to four vertically oriented Petri plates in a single experiment. SPIRO was designed for biologists by biologists; thus, its assembly does not require experience in engineering or programming and its operation is sufficiently intuitive to be carried out without training. SPIRO has a small footprint optimal for fitting into standard incubators for plants and microbes, and is equipped with an LED light source for imaging in the dark, thus allowing acquisition of photos under optimal growth conditions. SPIRO's web-based user interface allows setting up experiments and downloading data remotely, without interfering with samples growth. SPIRO's excellent image quality is optimal for automated image processing, which we demonstrate with two semi-automated assays for analysis of commonly used phenotypic traits: seed germination and root growth.

Moreover, the robot can be easily customized for a specific use, as all information about SPIRO, including the models for 3D-printed structural components, control software, and scripts for image analysis, are released under permissive open-source licenses.

**Keywords:** Time-lapse imaging, Phenotyping, Arabidopsis, Roots, Root growth, Seeds, Germination, Automated imaging, Automated image analysis, ImageJ, ImageJ macro, R, Raspberry Pi, 3D printing, Open science hardware, Lab automation

## 53 Introduction

54 Manual imaging of Petri plates using cameras or scanners is a common  
55 practice in biology experiments that require phenotyping of plant seedlings or  
56 microbial colonies. However, manual imaging necessitates removing the  
57 plates from the growth conditions and increases the risk of introducing  
58 unwanted variables into the experiment, e.g., changes in temperature,  
59 humidity, illumination, vector of gravity, and mechanical stress. Such  
60 fluctuations, especially if triggered repeatedly during time-lapse experiments,  
61 might significantly impact the phenotypes of interest, including plant seed  
62 germination, root growth, or microbial colony growth<sup>1-3</sup>. Furthermore, manual  
63 imaging has limited time resolution, causes inconsistencies in the time of  
64 imaging and impedes data acquisition during nights.

65 Automating labor- and time-intensive procedures is crucial to improving  
66 research quality and throughput, and open science hardware and software  
67 (tools which are freely available and modifiable) can help further this goal<sup>4-6</sup>.  
68 Moreover, open source hardware improves the transparency and  
69 reproducibility of science while delivering radical cost savings<sup>6</sup>, enabling less  
70 well-funded labs (including those in low-income countries) to afford high-  
71 quality equipment<sup>5</sup>.

72 A plethora of commercial and custom-made automated systems for imaging  
73 biological samples on Petri plates are already available<sup>7-13</sup>. However, we  
74 struggled to find an affordable platform that would be suitable for imaging  
75 Petri plates in standard plant growth incubators. Performing automated  
76 imaging under the growth conditions used for other experiments is crucial for  
77 direct comparison of the results, therefore we endeavored into developing a  
78 custom-made small footprint solution.

79 The result of our efforts is SPIRO, the compact **Smart Plate Imaging Robot**  
80 for time-lapse imaging of vertical Petri plates, which fits into standard  
81 plant/microbe incubators. SPIRO was designed for biologists by biologists,  
82 introducing end-user insight into its development. We ensured that no prior  
83 knowledge of mechanical engineering, electronics, or computer science is  
84 necessary for its assembly and operation. SPIRO comprises the absolute

85 minimum of components that warrants robust and reliable high-throughput  
86 time-lapse imaging and applicability for a broad range of experimental  
87 layouts. Owing to its minimalistic design, building the robot costs less than  
88 €200 (as of 2019), and it is not only easy to assemble but also to maintain,  
89 making it optimal for every-day use.

90 To further promote SPIRO's applicability, we have developed two designated  
91 assays for high-throughput analysis of images produced by the robot: SPIRO  
92 Seed Germination and SPIRO Root Growth Assays. The assays are designed  
93 for analysis of phenotypic traits commonly used in plant biology: seed size,  
94 germination time, primary root length and growth rate. SPIRO assays  
95 encompass complete start-to-finish detailed procedures comprising the  
96 preparation of Petri plates, automated imaging under user-defined conditions,  
97 semi-automated image processing and statistical analysis of the quantitative  
98 data.

99 SPIRO is powered by the open source computer platform Raspberry Pi<sup>14</sup> and  
100 comprises mostly 3D-printed hardware components, making it particularly  
101 suitable for customization. For the benefit of the scientific community, we are  
102 publishing SPIRO as an open source project with all information about its  
103 structural design, electronics, software and designated assays available under  
104 permissive licenses allowing unlimited use and modifications in the presence  
105 of correct attribution.

# Results

## General description/overview

SPIRO takes 8 megapixel (MP) time-lapse images of up to four Petri plates positioned on a rotating cube-shaped stage. It is equipped with green LEDs for illuminating plates while imaging in the dark, and is controlled via a web-based user interface (**Fig. 1A-D, Movie S1**). The latter feature enables setting up imaging conditions remotely via an Ethernet cable, Wi-Fi, or a built-in Wi-Fi hotspot, while the robot is inside a growth cabinet. (**Fig. 1A**) SPIRO's dimensions are ca 50 cm × 30 cm × 30 cm (length × width × height), it weighs less than 3 kg, and can easily be moved between locations.

SPIRO performs imaging in cycles, where one cycle comprises: (i) finding the “home” position, at which the first plate holder is facing the camera; (ii) measuring the average light intensity to determine if the ambient light intensity is sufficient for image acquisition without green LED illumination, or otherwise switching the LEDs on; (iii) taking an image and saving the file; (iv) rotating the stage by 90° to place the next plate holder in front of the camera, and repeating steps ii and iii until all plates are imaged. The duration of each cycle is less than two minutes, enabling high temporal resolution time-lapse imaging.

## Hardware design

The three main goals of the SPIRO hardware design were that it should be affordable, customizable, and that a person with no previous experience could build it easily. For this reason, we opted to use 3D-printed parts and standard aluminium profiles for the structural components (**Figure 1, Tables S1 and S2, Files S1 and S2**, and the SPIRO Hardware Repository<sup>15</sup>), and relatively cheap and readily available electronic components. 3D printing is inexpensive, allows for reproducible fabrication, rapid prototyping and modification, and is easily accessible. For example, printing can be done at publicly available facilities such as Makerspaces<sup>16</sup> or ordered from online services (3dhubs<sup>17</sup> or similar). Printed parts can be easily replicated if they get broken or customized

136 for a specific application. We successfully printed and tested four SPIRO  
137 prototypes in two independent laboratories using black matte PLA filament  
138 (for detailed information about printing, see **Table S2** and the SPIRO  
139 Hardware Repository<sup>15</sup>). The hardware proved to be easy to reproduce, robust  
140 and durable.

141 To facilitate use of SPIRO for a broad range of experiments we designed plate  
142 holders compatible with the most commonly used plate formats: a 12 cm  
143 square (Greiner Bio-One International, Item: 688102) and a 9 cm round Petri  
144 plate (Sarstedt, 82.1473.001), and enabled adjusting distance between the  
145 camera and the plate holders by moving the camera along the vertical and  
146 horizontal aluminum profiles (**Fig. 1A**).

## 147 Camera

148 SPIRO is equipped with a single 8 MP (3280×2464 pixels) color camera, and  
149 saves images as RGB PNG files. Image files are stored in a user-defined  
150 experiment folder and are automatically sorted into four sub-folders  
151 corresponding to each plate holder. Metadata useful for further analysis is  
152 included into the file names, i.e., the names contain the plate holder number,  
153 date and time of acquisition, and information about day or night mode (for  
154 detailed information, please refer to **File S4**). SPIRO acquires excellent quality  
155 images regardless of ambient illumination conditions, which is crucial for  
156 downstream automated data analysis (**Fig. 1E and F, Movie S2**).

157 We provide assembly instructions for two possible configurations of SPIRO  
158 (GitHub SPIRO Hardware<sup>15</sup>, **File S2**): the first is based on a Raspberry Pi v2  
159 camera and requires manual adjustment of the focus before starting an  
160 experiment; the second one implements an Arducam camera module with  
161 motorized focus, which enables remote focusing via the SPIRO software. Both  
162 cameras are very compact and allow imaging of complete Petri plates from a  
163 short distance without fisheye distortion effects, a feature crucial for  
164 quantitative comparison of seed and seedling measurements. In our  
165 experience, both configurations deliver the same image quality, and while the  
166 first configuration is somewhat cheaper, the second one is more convenient.

167 Notably, the first configuration can be relatively easily upgraded into the  
168 second. Furthermore, SPIRO is compatible with a range of MPI CSI (Mobile  
169 Industry Processor Interface Camera Serial Interface) cameras, which  
170 implementation might require minimal modifications of the camera house. As  
171 new cameras are being continuously developed, we strongly recommend  
172 checking the SPIRO Hardware repository for potential upgrades.

## 173 Computer

174 SPIRO's electronics layout (**File S2**) is optimized to enable all essential  
175 features for robust high-throughput imaging while minimizing costs and  
176 assembling complexity. SPIRO is powered by the cheap and readily available  
177 Raspberry Pi 3B+ single-board computer<sup>14</sup> that controls the other four  
178 components: a camera, stepper motor, positional sensor (mini microswitch)  
179 and LED light source. SPIRO's software and acquired images are hosted on a  
180 microSD card mounted on the Raspberry Pi computer and can be remotely  
181 accessed via Ethernet or Wi-Fi connection. Notably, Raspberry Pi is an open  
182 source computer platform designed for development of engineering solutions  
183 and is supported by a vivid community. Raspberry Pi is compatible with a  
184 multitude of electronics modules, sensors and components, often  
185 supplemented with suitable software packages<sup>18</sup>. It is thus optimal for further  
186 customizing the current SPIRO layout for specific uses.

## 187 Stepper motor and positional sensor

188 The cube-shaped stage of SPIRO is rotated by a stepper motor (i) during  
189 imaging, to position each of the four plate holders in front of the camera and  
190 (ii) between the imaging cycles, to ensure the plates are evenly exposed to the  
191 ambient conditions and that there is no shading effect from SPIRO's light  
192 screen (**Fig. 1**).

193 The 12 V unipolar stepper motor we recommend provides sufficient force to  
194 reproducibly move the weight corresponding to the stage with 4 square Petri  
195 plates containing medium and plants and a holding torque that stably holds the  
196 stage position during imaging. Importantly, the motor movement is smooth

197 and has no impact on Arabidopsis root growth under normal conditions  
198 (**Movie S2**).

199 The current layout of SPIRO requires two power supply units: a 5 V supply  
200 for the Raspberry Pi computer and a 12 V supply for the stepper motor and  
201 LED illuminator (**Fig. 1A, Table S1, File S2**). We decided for such  
202 configuration, as it drastically simplifies the assembly and maintenance of the  
203 robot, in comparison to implementing a single power supply unit.

204 At the beginning of each imaging cycle, the motor rotates the stage until the  
205 pin attached to the bottom of the stage presses the lever of a positional  
206 microswitch (**Fig. 1A, Movie S1**). After the signal from the microswitch is  
207 detected, the stepper motor makes a predefined number of steps, thus placing  
208 the first plate holder in front of the camera. If needed, the number of steps can  
209 be adjusted by the user in the “Calibrate motor” settings tab of the SPIRO  
210 software. After the image of the first plate holder is taken, the motor rotates  
211 the stage by 90° three more times, pausing to acquire images of the other three  
212 plate holders of SPIRO.

213 During prototyping, we considered implementation of either magnetic or  
214 infrared (IR) switches. However, a mechanical sensor provides the most robust  
215 system that is least susceptible to the presence of magnetic fields or stray light  
216 in the environment, and thus is applicable to a broader range of growth  
217 cabinets.

## 218 LEDs

219 SPIRO’s built-in light source enables imaging of Petri plates in the dark,  
220 providing another crucial benefit over manual imaging. The light source  
221 comprises a green LED strip mounted on a 3D-printed square frame with a  
222 diffuser (**Figure. 1, Movie S1**). The LED frame can slide along the horizontal  
223 axis to fine-tune illumination of the Petri plates for individual conditions (**Fig.**  
224 **1A**).



SPIRO does not require any instructions from the user about the day/night cycles in the growth cabinet. The intensity of ambient illumination is automatically assessed by SPIRO's camera immediately prior to acquiring each image. If sufficient illumination is detected, SPIRO takes an image in the "day" mode (**Fig. 1C, E**), otherwise the robot turns on the LED light source and acquires a "night" image (**Fig. 1D, F**). ISO and shutter speed for image acquisition can be adjusted individually for day and night modes in the web-based interface of the SPIRO software (**Fig. 1B**).

During prototyping, we tested night imaging using IR LEDs and the IR-sensitive Raspberry Pi NoIR camera. However, this increased the cost of the robot, while significantly complicating its electronics layout and focusing procedure, and did not provide satisfactory quality of images suitable for automated image analysis.

Typically, color camera detectors are most sensitive to green light, as they contain double the number of green pixels compared to red or blue. Hence, we speculated that using a green light source for illumination would be most efficient while using the color Raspberry Pi camera for imaging in the dark. Additionally, we took into consideration use of SPIRO for plant imaging. Plants are known to be dependent on the light of blue and red wavelengths for photosynthesis and regulation of the circadian cycle<sup>19,20</sup>. Although a number of studies showed that green light wavelengths also have important regulatory effect during plant growth and development, the reported effects were observed after prolonged irradiation<sup>21</sup>. Thus, we speculated that illuminating Petri plates with green LEDs only during imaging, should have the weakest impact on the growth and circadian cycle of imaged seedlings. To verify whether this was the case, we compared germination rates and root growth of *Arabidopsis thaliana* seeds and seedlings, respectively, imaged using two SPIRO systems, each with and without green LEDs. Germination was assessed using an ANOVA test where germination rate at  $t=50$  h was set as the dependent variable. Germination rate was compared at a single time point (50 h) due to the constraints imposed on germination detection by not having night image data available. For comparing the effect of LED illumination on root growth, plates with identical genotypes and media were imaged with and

without LED illumination. Two models were fitted: the first was the standard root growth model as described in the SPIRO Assay Manual (**File S4**), and the second was the same model but with the fixed effect of LED and all of its interaction effects added. Models were then compared using the anova function in R. Our analysis confirmed that green light indeed had no effect on germination and root growth (**Tables 1 and 2**).

**Table 1.** The results of an ANOVA test with one dependent variable (Germinated before  $t=50$  h), and three independent variables (genotype, system, LED), using four genotypes and 1154 seeds, indicate that SPIRO systems do not differ in performance and that LED illumination does not influence germination rates. The experiment was performed using the protocol provided in **File S4**.

|                  | <i>D.F.</i> | <i>Sum Sq</i> | <i>Mean Sq</i> | <i>F-value</i> | <i>p-value</i>           |
|------------------|-------------|---------------|----------------|----------------|--------------------------|
| <i>Genotype</i>  | 3           | 17.15         | 5.716          | 24.723         | 1.67 × 10 <sup>-15</sup> |
| <i>System</i>    | 1           | 0.09          | 0.094          | 0.407          | 0.524                    |
| <i>LED</i>       | 1           | 0.55          | 0.545          | 2.357          | 0.125                    |
| <i>Residuals</i> | 1148        | 265.44        | 0.231          |                |                          |

**Table 2.** Results of the comparison of root growth models with and without effect of LED, using 316 seedlings on two different SPIRO systems. The better model is the one not including the effects of LED, indicating that LED illumination has no effect on root growth

| <i>Model</i>       | <i>Log likelihood</i> | <i>Deviance</i> | $\chi^2$ | $\chi^2$<br><i>D.F.</i> | <i>p-value</i> |
|--------------------|-----------------------|-----------------|----------|-------------------------|----------------|
| <i>Without LED</i> | 65440                 | -130880         |          |                         |                |
| <i>With LED</i>    | 65281                 | -130563         | 0        | 30                      | 1.00           |

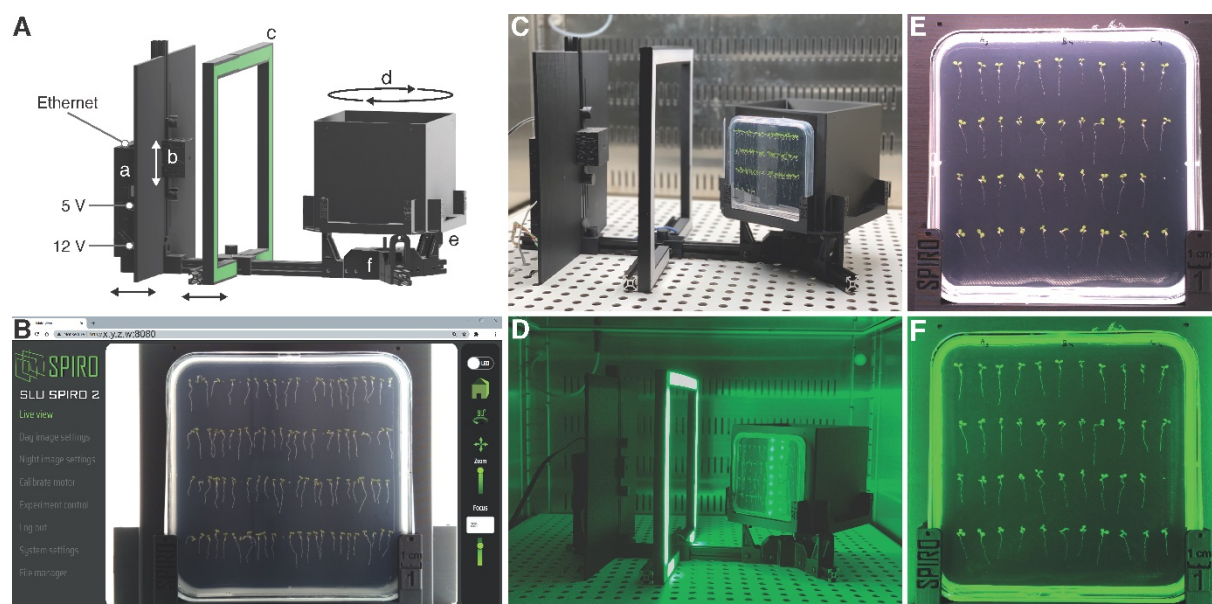

**Figure 1. SPIRO, Smart Plate Imaging Robot.**

(A) 3D rendering image of SPIRO. The robot is controlled by a Raspberry Pi computer placed within the electronics housing (a). The camera house is mounted on a vertical axis with an anti-reflection screen (b). The white arrow indicates possibility of adjusting the camera position along the vertical axis, the black arrows indicate the possibility to tune the distance between the camera and the stage. A green LED frame (c) provides illumination during imaging under night conditions. The cube-shaped stage can accommodate up to four Petri plates (d). At the beginning of each imaging cycle, the home position of the stage (where the first plate holder is facing the camera) is verified with the help of the positional sensor (e). The stage is rotated by a stepper motor (f).

(B) SPIRO is controlled by the designated software via a web-based graphical user interface, which allows users to adjust the settings for an experiment and to access imaging data.

(C) SPIRO in a plant growth cabinet under day conditions

(D) SPIRO in a plant growth cabinet under night conditions. SPIRO automatically detects insufficient illumination and turns on the LED for a fraction of a second while the image is taken.

(E, F) Examples of images acquired by SPIRO under day and night conditions, respectively.

## 277 SPIRO Accessories

278 To aid the use of SPIRO we designed a set of essential accessories (**Table S2**  
279 and the SPIRO Hardware GitHub Repository<sup>15</sup>).

280 3D-printable seed plating guides help the user to place Arabidopsis seeds on  
281 plates at regular distances from each other and from the edges of the plate. The  
282 latter is important to avoid overlaying seed and seedling images with  
283 reflections and shadows caused by the Petri plates' rims. The marked regular  
284 distance positions for seeds were optimized for the SPIRO Germination and  
285 Root Growth Assays described below.

286 The anti-reflection lids are designed to reduce reflections from seeds and  
287 seedlings that are usually visible in the Petri plates' lids. Although such  
288 reflections might not be an issue during imaging, their presence is detrimental  
289 for automated image processing, as some of them are difficult to automatically  
290 differentiate from actual biological samples (for more information see **Fig. 2**  
291 in the **File S4**).

## 292 Assembling SPIRO

293 SPIRO was developed specifically to enable its assembly by a person with no  
294 expertise or training in engineering, electronics and 3D printing. The complete  
295 list of components, step by step instructions, and tutorial videos for assembly  
296 are provided in **Tables S1** and **S2**, and **Files S1** and **S2**. However, we highly  
297 recommend to check the SPIRO Hardware Repository<sup>15</sup> for potential updates  
298 before assembly.

299 SPIRO hardware includes a set of standard parts, like aluminium profiles,  
300 screws and electronic components that need to be purchased. The complete  
301 list of these components and links with suggestions on where to purchase them  
302 is provided in **Table S1** and the SPIRO Hardware Repository<sup>15</sup>. Our  
303 experience of ordering hardware to build SPIRO prototypes in Germany and  
304 Sweden reproducibly showed that the most challenging part to acquire are the  
305 correct screws. At the moment, we cannot provide a plausible explanation for

306 this peculiar phenomenon and will try to upgrade the SPIRO specifications to  
307 reduce the requirements for screws. Notably, approximately one quarter of  
308 purchase costs were covering shipping expenses. Furthermore, some parts,  
309 such as the LED strips, had to be ordered in excess. Thus, building several  
310 SPIROs lowers the price per robot.

311 The STL, 3MF and F3D files for 3D-printable parts of SPIRO and the printing  
312 settings recommendations are provided in **Table S2**, **File S2** and the SPIRO  
313 Hardware Repository<sup>15</sup>. SPIRO's hardware was tested and optimized to be  
314 printed using PLA (polylactic acid) filament, which is the least expensive and  
315 sufficiently robust type of printable plastic. Printing in PETG (Polyethylene  
316 terephthalate glycol) and ABS (Acrylonitrile butadiene styrene) plastic is  
317 technically possible, but would require adjustment in scaling and printing  
318 settings, as the printed parts might shrink or warp significantly.

319 Printing all SPIRO parts using one 3D printer takes about seven days. The  
320 prototyping was done using Prusa i3 MK2/S and MK3S printers. Nevertheless,  
321 the pre-arranged components sets we provide (**Table S2**, SPIRO Hardware  
322 Repository<sup>15</sup>) can be printed on any type of 3D printer with the printing  
323 volume of 25x21x20cm or more. In our experience, the assembly procedure  
324 can be completed by a determined untrained person in approximately two full-  
325 time work days, while an experienced user can assemble SPIRO in about four  
326 hours.

## 327 **Software and Installation**

328 Since SPIRO was designed to be used within plant growth cabinets, we  
329 developed software that allows the remote control of SPIRO via the internet.  
330 Besides convenience of use, remote control of the robot is essential to enable  
331 setting up imaging parameters under the conditions that will be used during  
332 the experiment. SPIRO's software is used for adjusting the camera focus,  
333 setting up ISO and shutter speeds for day and night imaging conditions,  
334 defining the name and the duration of an experiment and the frequency of  
335 imaging, starting and terminating experiments and downloading imaging data

336 (for the detailed information please refer to **File S4** and the SPIRO Software  
337 Repository<sup>22</sup>).

338 SPIRO's software has an intuitive web-based graphical user interface that can  
339 be easily accessed from any web browser (**Fig. 1B**). The layout of the software  
340 was optimized with the help of several beta-testers to ensure that the interface  
341 is sufficiently self-explanatory, does not require training prior to use and  
342 contains the complete minimal number of essential features. The program and  
343 detailed installation instructions are provided in **File S2** and the SPIRO  
344 Software Repository<sup>22</sup>. The installation procedure requires SPIRO to be  
345 connected to the network, which can be done via the Ethernet port of the  
346 Raspberry Pi computer (**Fig. 1A**) or by connecting to a Wi-Fi network. For  
347 convenience, we recommend assigning SPIRO a static IP number, if this is  
348 possible within the user's network. After installation is complete, it is possible  
349 to activate a Wi-Fi hotspot from SPIRO's Raspberry Pi computer and use it  
350 for future connections to the robot (for instructions see **File S2** and the SPIRO  
351 Software Repository<sup>22</sup>).

352 While setting up and starting a SPIRO experiment is done via an internet  
353 connection or Wi-Fi hotspot, running the experiment does not require the robot  
354 to be online. However, internet connectivity provides access to images during  
355 the experiment run and to the data from the previously completed experiments.  
356 The SPIRO software is written in Python 3 and released under an open source  
357 2-clause Berkeley Software Distribution (BSD) license, allowing  
358 redistribution and modification of the source code as long as the original  
359 license and copyright notice are retained. SPIRO's simple and versatile  
360 program for image acquisition includes features making automated imaging  
361 possible under conditions that might vary between experiments and  
362 laboratories:

- 363 • Imaging cycles are carried out at a user-defined frequency and  
364 duration. Before each imaging cycle, the stepper motor makes a  
365 predefined number of steps after the positional microswitch sensor  
366 was detected in order to place the stage in the "home" position.

- 367 • Image acquisition is preceded by assessment of illumination intensity.  
 368 If the average pixel intensity on a sampled image is less than 10 (out  
 369 of a maximum of 255), the software triggers acquisition under user-  
 370 defined “night” settings and the LEDs are switched on for the duration  
 371 of acquisition (less than one second). If the average pixel intensity on  
 372 the sample image is higher than 10, the image is acquired with user-  
 373 defined “day” settings.
  
- 374 • Full resolution RGB photos of each of the four plate holders are saved  
 375 as PNG files on the microSD card mounted on the Raspberry Pi  
 376 computer, accessible via the web-based user interface of the SPIRO  
 377 software.
  
- 378 • While idling between imaging cycles, the stepper motor positions the  
 379 stage at alternating 45° to ensure that all plates are evenly exposed to  
 380 the conditions in the incubator.

## 381 **Setting up an experiment**

382 SPIRO was originally designed for imaging *Arabidopsis thaliana* seeds and  
 383 seedlings. We provide detailed guidelines for casting agar plates, sterilizing  
 384 and plating seeds, and adjusting imaging settings in **File S2**. For potential  
 385 updates please refer to the SPIRO Assays Repository<sup>23</sup>.

## 386 **SPIRO assays**

387 To thoroughly assess the data quality acquired using SPIRO and further  
 388 enhance applicability of the imaging platform for the plant biology  
 389 community, we developed complete pipelines for two commonly used  
 390 phenotyping assays that would greatly benefit from automated imaging: seed  
 391 germination and root growth assays. The assays comprise image processing  
 392 steps carried out by designated macro scripts in FIJI<sup>24</sup> (distribution of ImageJ)  
 393 and quantitative data processing steps carried out by custom R scripts. Step by  
 394 step instructions and scripts are provided in **Files S4** and **S5**. Please note that  
 395 updates are published in the SPIRO Assays Repository<sup>23</sup>.



Each assay starts with pre-processing of SPIRO raw data to combine individual images into time-lapse stack files with a set scale bar. The preprocessed data is then subjected to semi-automated image segmentation with identification of the objects of interest and measurement of their physical parameters, e.g., perimeter, length, and area, at successive time points. The quantitative data is then processed by R scripts to first ensure data quality and then apply custom-designed algorithms that determine seed size, germination time, root length and perform suitable statistical analyses.

The assays were designed to enable applicability for a broad range of experiment layouts and customization for specific uses, thus we introduced several user-guided steps that allow combining seeds or seedlings into groups of interests for analysis, trimming time ranges, renaming samples, removing outliers, etc.

Each assay provides the user with graphical and quantitative outputs and suitable statistical analysis of the data. The assay design ensures quick verification of image segmentation accuracy and identification of potential outliers.

Furthermore, to make combining data from several experiments for the statistical analysis user-friendly, we developed the SPIRO Assay Customizer<sup>25</sup>. Customizer takes the quantitative data from one or several experiments cleaned by the quality control R scripts, and provides the user with an intuitive graphical interface for merging experimental data, regrouping, renaming or removing samples.

The step-wise design of each assay with outputs at intermediate stages allow the user to choose between relying on the provided algorithms or taking over at any point to perform their own analysis of the data.

## SPIRO Seed Germination Assay

SPIRO Seed Germination Assay is based on the simple concept that the perimeter of a seed will steadily increase after germination, i.e., the radicle



emergence<sup>26</sup>, took place. Hence, the image segmentation part of the assay detects individual seeds on the photos (**Fig. 2A, Movie S2**), and tracks changes in the perimeter of each seed within a user-defined time range. The data is then gathered into user-defined groups, e.g., genotypes or treatments, and subjected to a clean-up using a designated R script. After this, for each seed the earliest time point of steady increase in perimeter is detected and identified as the time of germination. The assay is optimized for an imaging frequency of every 30 minutes and thus allows tracking minute differences in germination times. To take into account the effect of imbibition on the seed perimeter and also to compensate for the natural variation in Arabidopsis seed sizes, the germination algorithm normalizes perimeter changes for each seed by comparing it to the same seed perimeter averaged over the first five images in the time-lapse data.

The significance of difference between mean germination times for the user-selected groups of seeds is then assessed by the Kaplan-Meier test (**Fig. 2B**). Furthermore, the assay provides information about the size of individual seeds and the results of t-test comparing seed sizes for user-defined groups (**Fig. 2C**). Additionally, we implemented calculation of other germination parameters that might be valuable for the user, such as rate-of-germination curve, time at maximum germination rate; time required to achieve 50% of total germination efficacy, time required for 50% of total seeds to germinate (for detailed information see **File S4** and the SPIRO Assays repository<sup>23</sup>).

We verified the robustness of the semi-automated SPIRO Seed Germination Assay by comparing its results with germination time points detected manually on the same imaging data. The comparison of germination time points for 172 seeds revealed that the automated assay provides results similar to manual assessment ( $R^2=0.88$ , **Fig. 2D**). For this experiments, samples preparation and imaging was done according to the instructions provided in the **File S4**.

While developing the assay we optimized the SPIRO hardware and protocol for seed plating, and introduced seed plating guides that demark positions for placing seeds at optimal distance from each other and plate rims. As a result, when using four 12 cm square Petri plates, it is possible to detect germination

457 for up to 2300 seeds in a single experiment. Additionally, we strongly  
458 recommend using SPIRO anti-reflection lids to reduce image segmentation  
459 artifacts caused by reflections (**Fig. 2** in the **File S4**).

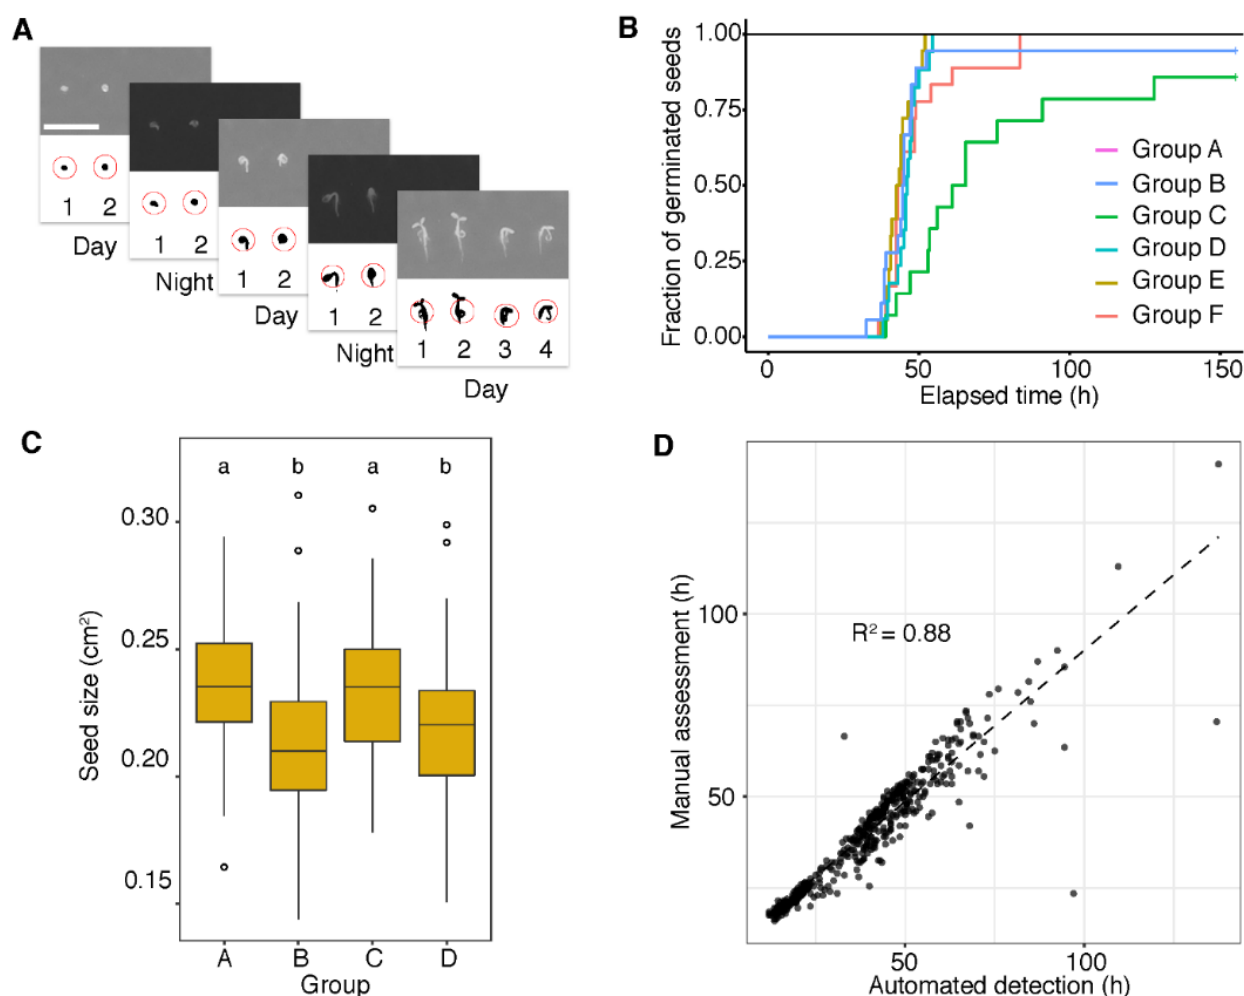

**Figure 2. SPIRO Seed Germination Assay.**

**A.** The graphical output of the SPIRO Seed Germination Assay includes a time-lapse stack file, in which each frame contains the original photo and the result of its segmentation, i.e., a mask for each recognized seed annotated by a number and a circle.

**B.** The assay provides Kaplan-Meier test results for germination of all groups of seeds included into analysis. Additional parameters for germination are calculated using the *germinationmetrics* package for R<sup>27</sup> (for more information see SPIRO Assay manual, **File S3**).

**C.** The assay also provides a t-test comparison of the mean seed size for the analyzed groups. Boxes represent interquartile range, the horizontal line denotes the median value, circles indicate outliers. Means of the groups that are not significantly different are annotated with the same small case letters,  $n = 684$  seeds.

**D.** Automatic detection of seed germination using SPIRO Seed Germination Assay provides results very similar to manual assessment of the germination ( $n=172$ ).

## 461 SPIRO Root Growth Assay

462 Quantifying primary root length of Arabidopsis seedlings is frequently used  
463 as a readout for physiological response to mutations or environmental  
464 stimuli<sup>13,28,29</sup>. SPIRO is an excellent platform for seedling root phenotyping.  
465 We first tested processing of SPIRO images by existing automated image  
466 analysis tools for detection of single roots and root systems on time-lapse  
467 data<sup>13,30,31</sup>. As these algorithms were optimized for a certain type of imaging  
468 data, their applicability for SPIRO-acquired images was limited.

469 Therefore, we developed the designated SPIRO Root Growth Assay, which  
470 uses SPIRO time-lapse data to track primary root length for individual  
471 seedlings starting from the germination time-point of the corresponding seed  
472 (**Fig. 3A, Movie S2**), builds a root growth rate model for user-defined groups  
473 of seedlings (**Fig. 3B**), and then performs statistical analysis comparing root  
474 lengths and growth rates for the groups (**Fig. 3C, File S4**, and the SPIRO  
475 Assays repository<sup>23</sup>). Similar to the SPIRO Seed Germination Assay, the Root  
476 Growth Assay provides the user with a graphical output that show the results  
477 of image segmentation for each user-selected group (**Fig. 3A**) and a  
478 quantitative output. The latter comprises (i) measurements of the segmented  
479 objects performed by the ImageJ macro; (ii) the measurements data cleaned  
480 up using a designated R script; (iii) germination time detected for each seed;  
481 (iv) curve charts for seedling's root lengths plotted vs absolute time or  
482 normalized to individual germination times; (v) curve charts generated by  
483 models for root growth rates of user-selected groups of seedlings (**Fig. 3B**);  
484 (vi) bar charts showing predicted root lengths for the groups of seedlings at  
485 24-h intervals (**Fig. 3C**) and (vii) results of the statistical analysis comparing  
486 growth rates and root lengths between user-defined groups. For more details  
487 please refer to the assay manual in **File S4** and the SPIRO Assays repository<sup>23</sup>.

488 Comparison of manual and automated measurements of 141 Arabidopsis  
489 roots, revealed that the SPIRO Root Growth Assay provides accuracy  
490 comparable with human performance (**Fig. 3D**).

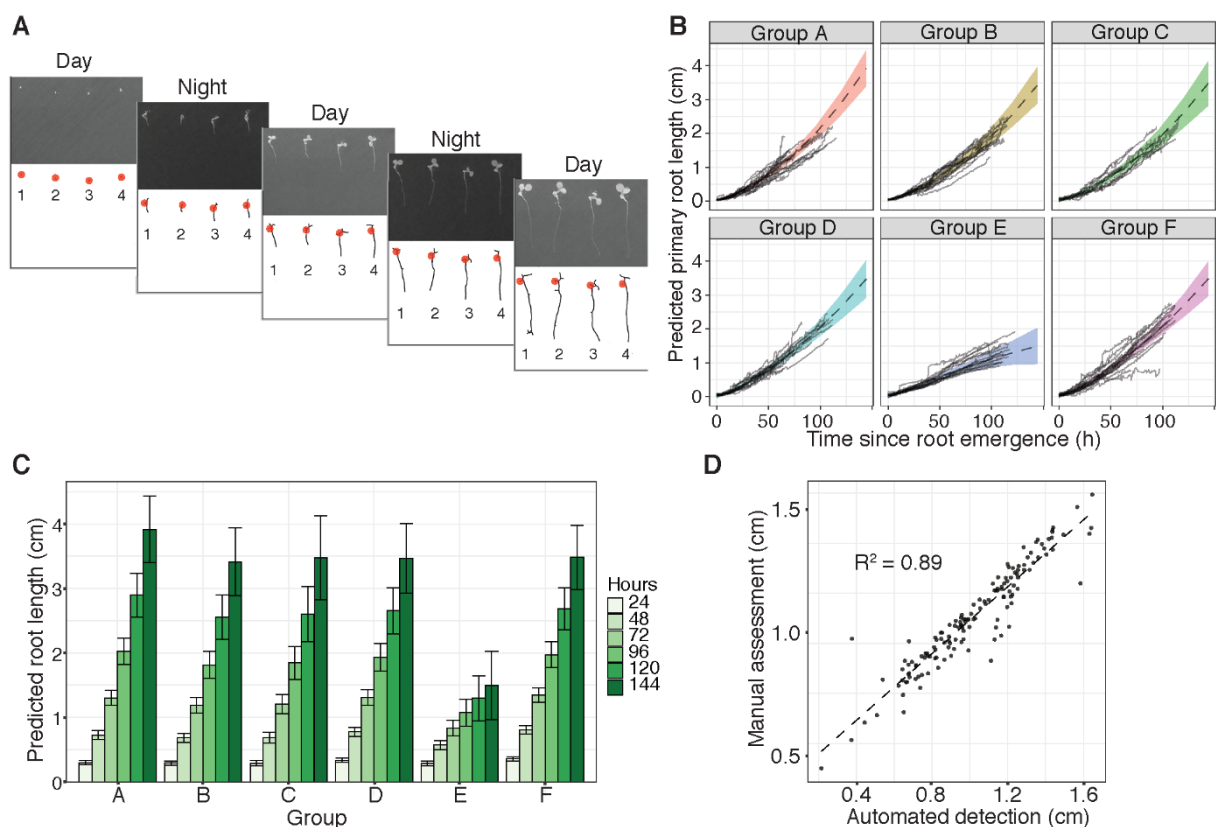

**Figure 3. SPIRO Root Growth Assay.**

**A.** Graphical output of the SPIRO Root Growth Assay includes a time-lapse stack file, wherein each frame contains the original photo and the result of its segmentation, i.e., a skeletonized mask for each recognized seedling with denoted root start coordinate (red dot) annotated with a seedling number.

**B.** The assay builds a model for root growth of each analyzed group (for more information see SPIRO Assay manual, **File S4**). For each root, the elapsed time is calculated from the time of germination for the corresponding seed. Black solid lines indicate root lengths plotted vs time for each seedling, the dotted black line is the predicted root length, and the colored area indicates standard error.

**C.** Based on the models shown in B, the assay also predicts average root length for each group at 24 h intervals. Error bars show standard error.

**D.** Automatic detection of root length using SPIRO Root Growth Assay provides results very similar to manual assessment of the root lengths (n=141 seedlings). Manual assessment was done using segmented line tool in ImageJ.

## 492 Discussion

493 In this publication we provide a thorough description of how to build and use  
494 the Smart Plate Imaging Robot, SPIRO. SPIRO provides excellent quality of  
495 images, acquired under desired growth conditions at regular time intervals. It  
496 is an affordable, versatile and robust imaging platform optimal for every-day  
497 use in plant biology and microbiology.

498 Open source engineering solutions can have a great impact on improving the  
499 quality, reproducibility, and transparency of research<sup>6</sup> but the benefit of their  
500 implementation is habitually undervalued. For instance, the amount of work  
501 hours required for manual time-lapse imaging of Petri plates is often  
502 underestimated by calculating only the time needed for acquiring images.  
503 However, the daily chore of photographing or scanning plates interferes with  
504 other work tasks that have to be fitted between imaging sessions and,  
505 depending on the desired imaging frequency, can become quite stressful.  
506 SPIRO not only frees up user's time by taking over the imaging workload, it  
507 also improves the quality of the acquired data and provides remote access to it  
508 from anywhere in the world. The latter feature turned out to be surprisingly  
509 useful during COVID-19 lockdown regulations.

510 We strongly believe that reducing the barrier of entry is crucial to the adoption  
511 of open science hardware, especially in non-engineering disciplines. In our  
512 experience, one of the significant bottlenecks in implementing engineering  
513 solutions custom-designed for laboratory use is the requirement of expertise  
514 in subjects that are not necessarily popular among biologists, such as  
515 mechanical engineering and electronics. SPIRO was developed specifically  
516 for biologists, and its design has at its core the concept of being simple and  
517 intuitive enough to be assembled and operated with no training in engineering,  
518 3D printing, programming or using the SPIRO per se. Furthermore, we strived  
519 to develop an imaging platform that can be built anywhere in the world without  
520 requiring access to rare specialized infrastructure and would be affordable also  
521 for research groups with limited funding. During preparation of this  
522 manuscript, multiple SPIROs have been already constructed in six laboratories  
523 located in four different countries using only the provided instructions, thus

524 confirming the need for such platform and validating our approach to making  
525 its construction accessible.

526 The current configuration of SPIRO is optimized for image acquisition under  
527 conditions commonly used in plant biology and microbiology. Moreover, the  
528 underlying Raspberry Pi platform is ideal for further expanding the system. A  
529 large variety of Raspberry Pi-compatible sensors and other input/output  
530 modules could be incorporated into a custom-built SPIRO system to  
531 accommodate different research needs. For example, cheap sensors for  
532 temperature and humidity<sup>18</sup> can be connected to unused general-purpose  
533 input/output (GPIO) pins on the computer board. Such upgrades can be  
534 valuable when using SPIRO in a growth chamber that does not provide control  
535 or logging of these parameters.

536 We based our design on the use of 3D-printed structural components to further  
537 facilitate customization of SPIRO. We provide F3D model files that can be  
538 easily modified using Autodesk Fusion 360 software (**File S1**). As of 2021,  
539 Autodesk offers a free license tier for academic users, which includes training  
540 material. Furthermore, use of 3D-printed parts warrants reproducibility and  
541 robustness of the structural components, enables their easy replacement for  
542 maintenance and ensures that assembly can be done without access to rare  
543 specialized infrastructures. For instance, not only 3D printers are becoming  
544 increasingly affordable, with the cheapest models costing less than €200, but  
545 prints can also be ordered using commercial services<sup>17</sup> or at public Makerspace  
546 facilities<sup>16</sup>.

547 We demonstrate analysis of high-throughput SPIRO-acquired data in the two  
548 semi-automated assays for seed germination and seedling root growth. The  
549 detailed protocols for the assays comprise the complete procedure from  
550 preparing Petri plates to statistical analysis of the data. Both assays provide  
551 data analysis accuracy closely matching human performance (**Fig. 2D** and  
552 **3D**). Moreover, the SPIRO Seed Germination Assay enables very high  
553 temporal resolution enabling the detection of minute differences in  
554 germination times. Importantly, despite its small footprint, the platform still  
555 provides practical throughput: a single SPIRO can image up to 2300 seeds in

556 a single experiment for the Germination Assay, and 190 seedlings for the Root  
557 Growth Assay. In their current versions, the assays are implemented using  
558 ImageJ and R, software commonly used in biology labs, which should make  
559 their use and customization relatively uncomplicated. We have developed  
560 them as “plug-and-play” image analyses that are optimized for SPIRO data  
561 and provide outstanding results for the intended purpose. Implementation of  
562 the recent advances in machine learning approaches<sup>32–34</sup> will require thorough  
563 training of appropriate models for image segmentation, but will eventually  
564 enable a more advanced analyses of SPIRO-acquired data such as detangling  
565 of crossing roots, measurement of lateral roots, hypocotyls and cotyledons  
566 under day and night conditions.

567 The demand for affordable automated platform for Petri plate imaging is  
568 clearly illustrated by the number of publications describing various prototypes  
569 of such system<sup>7,9,12,32,33,35</sup>. However, we could not find a solution that would  
570 be simultaneously affordable, compatible with standard growth cabinets,  
571 provide high-quality data and come with instructions comprehensible for a  
572 person not trained in engineering. Hence, we pursued developing SPIRO to  
573 establish a platform that would enable universal access to automated high-  
574 quality imaging for all research groups, independent on their training or  
575 funding situation, and enable easy integration of the automated approach into  
576 ongoing research.

577 For the sake of posterity, the current version of the complete information about  
578 SPIRO's construction and use is provided in the supplementary information of  
579 this publication. However, SPIRO is under active development, and all  
580 updates are made available on the designated GitHub repositories<sup>15,22,23,25</sup>. We  
581 release all components of SPIRO as open-source material under licenses  
582 allowing unlimited use and modifications as long as proper attribution is  
583 present. The assays provided here are only two examples of the broad variety  
584 of possible SPIRO applications. The outstanding quality and fidelity of  
585 SPIRO's images forms an excellent basis for any Petri plate-based imaging  
586 assay. We hope that SPIRO will help alleviate some pains of routine lab work  
587 and will also become a stepping stone for advancement of users' interests in  
588 developing further solutions. We encourage users to further customize the



589 platform, develop image-analysis pipelines suited for their own research and  
590 share optimization with the scientific community.

## 591 **Competing interests**

---

592 The authors declare no competing interests.

## 593 **Acknowledgements**

---

594 We would like to express our deepest gratitude to: Sebastian Mai (Heidelberg  
595 University) who provided valuable advice, resistors and terminal ports for  
596 SPIRO hardware development; all members of Prof. Karin Schumacher's  
597 research group (Heidelberg University, Germany) for their patience and moral  
598 support and especially to Rainer Waadt for the name SPIRO; August Bergh,  
599 Thomas Danielsson, and Ping Wu (Ångström laboratory, Uppsala University,  
600 Sweden) for their contribution to the development of the early prototype; and  
601 to Johan Roxendal (Gothenburg University) and Dan Rosén (Uppsala  
602 University) for their contributions to the SPIRO software.

603 This study was supported by the funding from EU Horizon 2020 MSCA IF  
604 (799433 to EA Minina), Carl Tryggers Foundation (CTS 14 326 and 20:287  
605 to EA Minina), DFG (CRC1101, TPA02 to K Schumacher), Formas (2019-  
606 01565 to AN Dauphinee), Formas (2016-20031 to M Sandgren), Knut and  
607 Alice Wallenberg Foundation (2018.0026 to PV Bozhkov), the Swedish  
608 Research Council VR (621-2013-4707 to PV Bozhkov), the Swedish  
609 Foundation for Strategic Research (Oil Crops for the Future), and Crops for  
610 the Future Research Programme at the Swedish University of Agricultural  
611 Sciences.

| <b>Supplementary material</b> | <b>File name</b>                                         | <b>Description</b>                                                                                                                                                                                                                   |
|-------------------------------|----------------------------------------------------------|--------------------------------------------------------------------------------------------------------------------------------------------------------------------------------------------------------------------------------------|
| <b>Table S1</b>               | Table S1. List of components to be purchased. <b>pdf</b> | List of components to be purchased and suggestions of vendors                                                                                                                                                                        |
| <b>Table S2</b>               | Table S2. List of 3D-printable components. <b>pdf</b>    | List of 3D-printable components and instructions for printing settings                                                                                                                                                               |
| <b>Supplementary File 1</b>   | Files for 3D printing. <b>zip</b>                        | Printable (STL, 3MF), and editable (F3D) model files                                                                                                                                                                                 |
| <b>Supplementary File 2</b>   | SPIRO Assembly Instructions. <b>pdf</b>                  | SPIRO Assembly Instructions and links to tutorial videos                                                                                                                                                                             |
| <b>Supplementary File 3</b>   | spiro-software. <b>zip</b>                               | SPIRO Software GitHub repository archive file                                                                                                                                                                                        |
| <b>Supplementary File 4</b>   | SPIRO Assays Manual. <b>pdf</b>                          | SPIRO Assays Manual                                                                                                                                                                                                                  |
| <b>Supplementary File 5</b>   | SPIRO Assays. <b>zip</b>                                 | SPIRO Assays GitHub repository archive file                                                                                                                                                                                          |
| <b>Supplementary File 6</b>   | SPIRO Assay Customizer. <b>zip</b>                       | SPIRO Assay Customizer archive file                                                                                                                                                                                                  |
| <b>Supplementary Video 1</b>  | Supplementary movie 1. <b>mp4</b>                        | SPIRO Overview. A video showing two SPIRO systems placed in a plant growth incubator and the time-lapse video recorded using them                                                                                                    |
| <b>Supplementary Video 2</b>  | Supplementary movie 2. <b>mp4</b>                        | Demonstration of the image quality acquired by SPIRO and the capabilities of the two companion SPIRO Assays. The movie shows raw and preprocessed data, as well as illustrates the output of the Germination and Root Growth Assays. |

## **List of supplementary material**

612

613

# References

1. Quint, M. *et al.* Molecular and genetic control of plant thermomorphogenesis. *Nat. Plants* **2**, 1–9 (2016).
2. Topham, A. T. *et al.* Temperature variability is integrated by a spatially embedded decision-making center to break dormancy in *Arabidopsis* seeds. *Proc. Natl. Acad. Sci. U. S. A.* **114**, 6629–6634 (2017).
3. De Ligne, L. *et al.* Analysis of spatio-temporal fungal growth dynamics under different environmental conditions. *IMA Fungus* **10**, 1–13 (2019).
4. Pearce, J. M. Return on investment for open source scientific hardware development. *Sci. Public Policy* **43**, 192–195 (2016).
5. Maia Chagas, A. Haves and have nots must find a better way: The case for open scientific hardware. *PLoS Biol.* **16**, e3000014 (2018).
6. Pearce, J. M. Economic savings for scientific free and open source technology: A review. *HardwareX* **8**, e00139 (2020).
7. Yazdanbakhsh, N. & Fisahn, J. High throughput phenotyping of root growth dynamics, lateral root formation, root architecture and root hair development enabled by PlaRoM. *Funct. Plant Biol.* **36**, 938–946 (2009).
8. Subramanian, R., Spalding, E. P. & Ferrier, N. J. A high throughput robot system for machine vision based plant phenotype studies. *Mach. Vis. Appl.* **24**, 619–636 (2013).
9. Nagel, K. A. *et al.* The platform GrowScreen-Agar enables identification of phenotypic diversity in root and shoot growth traits of agar grown plants. *Plant Methods* **16**, 1–17 (2020).
10. <https://800ezmicro.com/equipment/anaerobic-microaerobic-systems/32-petrifoto-plate-imaging-system.html>.
11. Tovar, J. C. *et al.* Raspberry Pi-powered imaging for plant phenotyping. *Appl. Plant Sci.* **6**, e1031 (2018).
12. Slovak, R. *et al.* A scalable open-source pipeline for large-scale root phenotyping of *Arabidopsis*. *Plant Cell* **26**, 2390–2403 (2014).
13. Satbhai, S. B., Göschl, C. & Busch, W. Automated high-throughput root phenotyping of *Arabidopsis thaliana* under nutrient deficiency conditions. *Methods Mol. Biol.* **1610**, 135–153 (2017).
14. <https://www.raspberrypi.org/>. No Title.

- 650 15. <https://github.com/AlyonaMinina/SPIRO.Hardware>.
- 651 16. <https://www.makerspaces.com/what-is-a-makerspace/>.
- 652 17. <https://www.3dhubs.com/>.
- 653 18. [https://tutorials-raspberrypi.com/raspberry-pi-sensors-overview-50-](https://tutorials-raspberrypi.com/raspberry-pi-sensors-overview-50-important-components/)  
654 [important-components/](https://tutorials-raspberrypi.com/raspberry-pi-sensors-overview-50-important-components/).
- 655 19. Eriksson, M. E. & Millar, A. J. The circadian clock. A plant's best  
656 friend in a spinning world. *Plant Physiol.* **132**, 732–738 (2003).
- 657 20. Wientjes, E., Philippi, J., Borst, J. W. & van Amerongen, H. Imaging  
658 the Photosystem I/Photosystem II chlorophyll ratio inside the leaf.  
659 *Biochim. Biophys. Acta - Bioenerg.* **1858**, 259–265 (2017).
- 660 21. Folta, K. M. & Maruhnich, S. A. Green light: A signal to slow down  
661 or stop. *J. Exp. Bot.* **58**, 3099–3111 (2007).
- 662 22. <https://github.com/jonasoh/spiro>.
- 663 23. <https://github.com/jiaxuanleong/SPIRO.Assays>.
- 664 24. Schindelin, J. *et al.* Fiji: An open-source platform for biological-  
665 image analysis. *Nat. Methods* **9**, 676–682 (2012).
- 666 25. <https://github.com/jonasoh/spiro-assay-customizer>.
- 667 26. Bewley, J. D. Seed Germination and Dormancy. *Plant Cell* **44**, 1055–  
668 1066 (1997).
- 669 27. Aravind, J., Vimala Devi, S., Radhamani, J., Jacob, S. R. & Kalyani,  
670 S. Germinationmetrics: Seed Germination Indices and Curve Fitting.  
671 R package version 0.1.3.9000. (2020).
- 672 28. Patterson, K. *et al.* Nitrate-regulated glutaredoxins control  
673 arabidopsis primary root growth. *Plant Physiol.* **170**, 989–999  
674 (2016).
- 675 29. Lucas, M. *et al.* SHORT-ROOT regulates primary, lateral, and  
676 adventitious root development in Arabidopsis. *Plant Physiol.* **155**,  
677 384–398 (2011).
- 678 30. Betegón-Putze, I., González, A., Sevillano, X., Blasco-Escámez, D.  
679 & Caño-Delgado, A. I. MyROOT: a method and software for the  
680 semiautomatic measurement of primary root length in Arabidopsis  
681 seedlings. *Plant J.* **98**, 1145–1156 (2019).
- 682 31. Lobet, G., Draye, X. & Périlleux, C. An online database for plant  
683 image analysis software tools. *Plant Methods* **9**, (2013).

- 684 32. Gaggion, N. *et al.* ChronoRoot: High-throughput phenotyping by  
685 deep segmentation networks reveals novel temporal parameters of  
686 plant root system architecture. *bioRxiv* (2020)  
687 doi:10.1101/2020.10.27.350553.
- 688 33. Yasrab, R. *et al.* RootNav 2.0: Deep learning for automatic  
689 navigation of complex plant root architectures. *Gigascience* **8**, 1–16  
690 (2019).
- 691 34. Dobos, O., Horvath, P., Nagy, F., Danka, T. & Viczián, A. A deep  
692 learning-based approach for high-throughput hypocotyl phenotyping.  
693 *Plant Physiol.* **181**, 1415–1424 (2019).
- 694 35. Ding, X., Vogel, M., Boschke, E., Bley, T. & Lenk, F. PetriJet  
695 Platform Technology: An Automated Platform for Culture Dish  
696 Handling and Monitoring of the Contents. *J. Lab. Autom.* **20**, 447–  
697 456 (2015).
- 698
