# Supplementary material for: SPIRO – the automated Petri plate imaging platform designed by biologists, for biologists
Source: bioRxiv or medRxiv preprint supplement (doi:10.1101/2021.03.15.435343), 2023-11-07
Supplement: Supplementary file [file media-6.pdf]

|                          | #   | The components                                                                              | Distributor                         | Catalog number                                       | Quantity required for one SPIRO system                                                                                          |
|--------------------------|-----|---------------------------------------------------------------------------------------------|-------------------------------------|------------------------------------------------------|---------------------------------------------------------------------------------------------------------------------------------|
|                          |     | <b>Electronics</b>                                                                          |                                     |                                                      |                                                                                                                                 |
| <input type="checkbox"/> | 1   | Raspberry Pi 3B+                                                                            | <a href="#">Mouser</a>              | 358-RPI3-MODBP-BULK                                  | 1                                                                                                                               |
| <input type="checkbox"/> | 2   | Power supply 5V 2.5A, micro USB                                                             | <a href="#">Mouser</a>              | 358-1101001000045                                    | 1                                                                                                                               |
| <input type="checkbox"/> | 3   | Adafruit TB6612 h-bridge dc-stepper motor driver breakout board                             | <a href="#">Mouser</a>              | 485-2448                                             | 1                                                                                                                               |
| <input type="checkbox"/> | 4   | Unipolar stepper motor NEMA-17, 12V, 0.35A                                                  | <a href="#">Mouser</a>              | 485-324                                              | 1                                                                                                                               |
| <input type="checkbox"/> | 5   | Power adapter 12V 3A with with 2.1 power plug                                               | <a href="#">Amazon</a>              |                                                      | 1                                                                                                                               |
| <input type="checkbox"/> | 6   | Female DC connector 5.5 x2.1mm                                                              | <a href="#">Amazon</a>              |                                                      | 1                                                                                                                               |
| <input type="checkbox"/> | 7   | SparkFun MOSFET Power Control Kit                                                           | <a href="#">Mouser</a>              | 474-COM-12959                                        | 1                                                                                                                               |
| <input type="checkbox"/> | 8   | Green LED strip 12V (note: must be possible to cut into 5-cm segments!)                     | <a href="#">Mouser</a>              | 828-OVQ12S30G7                                       | 1 meter                                                                                                                         |
| <input type="checkbox"/> | 9   | 90 degree connectors for 8 mm LED strip + terminal LED strip connector                      | <a href="#">Amazon</a>              |                                                      | 4 corners + 1 terminal connector                                                                                                |
| <input type="checkbox"/> | 10  | 2-pin 3.5 mm pitch PCB Mount Screw Terminal Connector                                       | <a href="#">Mouser</a>              | 710-691214110002S                                    | 1                                                                                                                               |
| <input type="checkbox"/> | 11  | Jumper cables 10 cm, female to female (Dupont wires)                                        | <a href="#">Amazon</a>              |                                                      | 20                                                                                                                              |
| <input type="checkbox"/> | 12  | SD Memory Card Class 10 or higher, 32 GB or more                                            | <a href="#">Mouser</a>              | 467-SDSDQAE-032G                                     | 1                                                                                                                               |
| <input type="checkbox"/> | 13  | Heat shrink tubes, diameter 1 mm and 2 mm                                                   | <a href="#">Amazon</a>              |                                                      | 5 cm of each                                                                                                                    |
| <input type="checkbox"/> | 14  | Wire end ferrules, 0.5 mm <sup>2</sup> , not insulated                                      | <a href="#">Amazon</a>              |                                                      | 20                                                                                                                              |
| <input type="checkbox"/> | 15  | AWG 28 wires, longer than 40 cm                                                             | <a href="#">Amazon</a>              |                                                      | ca 3 m                                                                                                                          |
| <input type="checkbox"/> | 16  | Spiral wire cover (Coiled cable protection)                                                 | <a href="#">Amazon</a>              |                                                      | ca 30 cm                                                                                                                        |
|                          |     | <b>Camera</b>                                                                               |                                     |                                                      |                                                                                                                                 |
| <input type="checkbox"/> | 17  | Adafruit Flex Cable for Raspberry Pi Camera                                                 | <a href="#">Amazon</a>              |                                                      | 25-30 cm                                                                                                                        |
|                          | 18a | <b>SPIRO configuration with manual focus:</b>                                               |                                     |                                                      |                                                                                                                                 |
| <input type="checkbox"/> |     | Raspberry Pi Camera v2 - 8 MP                                                               | <a href="#">Mouser</a>              | 485-3099                                             | 1                                                                                                                               |
|                          | 18b | <b>SPIRO configuration with motorized focus:</b>                                            |                                     |                                                      |                                                                                                                                 |
| <input type="checkbox"/> |     | Raspberry Pi Camera v2 - 8 MP                                                               | <a href="#">Mouser</a>              | 485-3099                                             | 1                                                                                                                               |
| <input type="checkbox"/> |     | Arducam IMX219 8MP Auto Focus Camera Module, drop-in replacement for Raspberry Pi V2 Camera | <a href="#">Uctronics</a>           | SKU: B0182                                           | 1                                                                                                                               |
|                          |     | <b>Positional sensor</b>                                                                    |                                     |                                                      |                                                                                                                                 |
| <input type="checkbox"/> | 19  | Mini microswitch                                                                            | <a href="#">Reichelt elektronik</a> | MAR 1050.5202                                        | 1                                                                                                                               |
|                          |     | <b>Structural parts</b>                                                                     |                                     |                                                      |                                                                                                                                 |
| <input type="checkbox"/> | 20  | Aluminium profile T2020, black                                                              | <a href="#">Amazon</a>              |                                                      | 1x 30cm for the vertical rail, 1x ca 34 cm for the horizontal rail, 2x ca 8cm for each leg, 2x 14 cm for the LED frame mounting |
| <input type="checkbox"/> | 21  | 2020 Aluminum Profile Slot Cover, black                                                     | <a href="#">Banggood</a>            |                                                      | 1 m                                                                                                                             |
| <input type="checkbox"/> | 22  | 635zz - R-1950ZZ - 5972K263 Miniature Ball Bearings                                         | <a href="#">Amazon</a>              |                                                      | 3                                                                                                                               |
| <input type="checkbox"/> | 23  | Rigid shaft coupling M5 to M5                                                               | <a href="#">Amazon</a>              |                                                      | 1                                                                                                                               |
|                          |     | <b>Screws</b>                                                                               |                                     |                                                      |                                                                                                                                 |
| <input type="checkbox"/> | 24  | M2.5 x 12mm, button head                                                                    |                                     |                                                      | 2                                                                                                                               |
| <input type="checkbox"/> | 25  | M2.5 x 12mm, flat head countersunk, black                                                   |                                     |                                                      | 2                                                                                                                               |
| <input type="checkbox"/> | 26  | M2.5 x 8mm, flat head countersunk                                                           |                                     |                                                      | 8                                                                                                                               |
| <input type="checkbox"/> | 27  | M2.5 hex nuts                                                                               |                                     |                                                      | 12                                                                                                                              |
| <input type="checkbox"/> | 28  | M3 x 12 mm, button head, hex socket, black                                                  |                                     |                                                      | 8                                                                                                                               |
| <input type="checkbox"/> | 29  | M3 x 20mm, flat head countersunk                                                            |                                     |                                                      | 4                                                                                                                               |
| <input type="checkbox"/> | 30  | M3 hex nuts                                                                                 |                                     |                                                      | 8                                                                                                                               |
| <input type="checkbox"/> | 31  | M5 x 8 mm, flat head countersunk, black                                                     |                                     |                                                      | 1                                                                                                                               |
| <input type="checkbox"/> | 32  | M5 x 12 mm, flat head countersunk                                                           |                                     |                                                      | 8                                                                                                                               |
| <input type="checkbox"/> | 33  | M5 x 8 mm screw, button head, hex socket, black                                             |                                     |                                                      | 21                                                                                                                              |
| <input type="checkbox"/> | 34  | M5 x 16 mm screw, button head, hex socket, black                                            |                                     |                                                      | 3                                                                                                                               |
| <input type="checkbox"/> | 35  | M5 x 16mm bolt, hex head                                                                    |                                     |                                                      | 5                                                                                                                               |
| <input type="checkbox"/> | 36  | M5 x 20mm bolt, hex head                                                                    |                                     |                                                      | 1                                                                                                                               |
| <input type="checkbox"/> | 37  | M5 T-nuts for T2020 aluminium profile                                                       |                                     |                                                      | 35                                                                                                                              |
| <input type="checkbox"/> | 38  | M5 hex nuts                                                                                 |                                     |                                                      | 3                                                                                                                               |
| <input type="checkbox"/> | 39  | M5 washer, OD 10 mm, flat                                                                   |                                     |                                                      | 6                                                                                                                               |
| <input type="checkbox"/> | 40  | M5 slide-in bracket for T2020 aluminium profile                                             |                                     |                                                      | 3                                                                                                                               |
| <input type="checkbox"/> | 41  | M5 x 11 mm, button head, hex socket, black                                                  |                                     |                                                      | 6                                                                                                                               |
|                          |     | <b>Plastic for the 3D printer</b>                                                           |                                     |                                                      |                                                                                                                                 |
| <input type="checkbox"/> | 42  | PLA filament, matte black                                                                   | <a href="#">3Dprinthings</a>        | Matteforge Pro Filament PLA 1.75 mm, black           | ca 1.5 kg                                                                                                                       |
| <input type="checkbox"/> | 43  | PLA filament, milky white                                                                   | <a href="#">Amazon</a>              | Sunlu, PLA+, 1.75 mm, milky white / semi-transparent | ca 200 g                                                                                                                        |
|                          |     | <b>Tools</b>                                                                                |                                     |                                                      |                                                                                                                                 |
| <input type="checkbox"/> | 44  | Wire stripper suitable for AWG 28 wires                                                     | <a href="#">Amazon</a>              |                                                      |                                                                                                                                 |
| <input type="checkbox"/> | 45  | Ferrule crimper suitable for 0.5 mm <sup>2</sup> ferrules                                   | <a href="#">Amazon</a>              |                                                      |                                                                                                                                 |
| <input type="checkbox"/> | 46  | Soldering iron & solder                                                                     | <a href="#">Amazon</a>              |                                                      |                                                                                                                                 |
| <input type="checkbox"/> | 47  | Screw drivers for M2, M2.5 and M3 (cross and flat head)                                     |                                     |                                                      |                                                                                                                                 |
| <input type="checkbox"/> | 48  | Allen keys for M5 & M3                                                                      |                                     |                                                      |                                                                                                                                 |
| <input type="checkbox"/> | 49  | A saw for aluminium profiles                                                                |                                     |                                                      |                                                                                                                                 |
| <input type="checkbox"/> | 50  | Superglue                                                                                   | any would do                        |                                                      |                                                                                                                                 |
|                          |     | <b>Optional</b>                                                                             |                                     |                                                      |                                                                                                                                 |

|                          | #  | The components | Distributor            | Catalog number | Quantity required for one SPIRO system                                                                                                                                  |
|--------------------------|----|----------------|------------------------|----------------|-------------------------------------------------------------------------------------------------------------------------------------------------------------------------|
| <input type="checkbox"/> | 51 | Ethernet cable | <a href="#">Amazon</a> |                | 1 cable, the length will depend on the distance between the robot and ethernet port. we strongly recommend using flat ethernet cables to enable closing incubators door |
